# Supplementary material for: Visual impact beam plots: Analyzing research profiles and bibliometric metrics using the following-leading clustering algorithm (FLCA)
Source: PubMed Central journal article supplement — Medicine (Baltimore). 2023 Jul 14;102(28):e34301. doi: 10.1097/MD.0000000000034301 (PMC10344504; doi:10.1097/md.0000000000034301), 2023-07-14
Supplement: medi-102-e34301-s002.pdf [file medi-102-e34301-s002.pdf]

## How to conduct this study

Web of Science 核心合輯中有 620 個結果：

🔍 Jang, Sung Ho (作者) 分析結果 引用文獻報告 🔔 建立追蹤

[複製查詢結果連結](#)

出版品 您可能也會喜歡...

限縮結果

在結果內檢索...

依勾選清單篩選

快速篩選

- 📄 Review Article 37
- 📖 開放取用 266
- 📊 被引參考文獻深度分析 38

0/620 新增至勾選清單 匯出 排序依據: 相關性

< 1 / 13 >

1 🔒 **Injury of the Spinothalamic Tract Following Whiplash Injury: A Diffusion Tensor Tractography Study**

[Jang, SH; Kim, K and Seo, YS](#) 43 參考文獻

Feb 28 2023 | [JOURNAL OF INTEGRATIVE NEUROSCIENCE](#) 22 (2)

Objectives: Using diffusion tensor tractography (DTT), we demonstrated the spinothalamic tract (STT) injury in patients with central pain following whiplash injury. Our primary hypothesis is that f ... [顯示更多](#)

620 新增至勾選清單

1 / 13 >

**Injury of the Spinothalamic Tract Following Whiplash Injury: A Diffusion Tensor Tractography Study**

[Jang, SH; Kim, K and Seo, YS](#)

Feb 28 2023 | [JOURNAL OF INTEGRATIVE NEUROSCIENCE](#) 22 (2)

Objectives: Using diffusion tensor tractography (DTT), we demonstrated the spinothalamic tract (STT) injury in patients with central pain following whiplash injury. Our primary hypothesis is that f ...

[來自出版商的免費全文](#)

- EndNote Online
- EndNote 桌面版
- 新增至我的研究人員個人檔案
- 純文字檔案 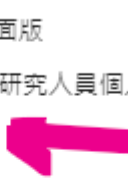
- RefWorks
- RIS (其他參考軟體)
- BibTeX
- Excel
- Tab 字元分隔檔案
- 可列印 HTML 檔案
- InCites
- 電子郵件

### 將記錄匯出至純文字檔案

記錄選項

頁面上的所有記錄

記錄自：  到

一次不可超過 1000 筆記錄

記錄內容：

- 作者、標題、來源
- 作者、標題、來源、摘要
- 完整記錄
- 完整記錄和被引參考文獻

自訂選取 (11)

Dec 16 2022 | MEDICINE 101 (50)

|    | A             | B  | C | D    | E          | F          | G               | H          | I           | J          |
|----|---------------|----|---|------|------------|------------|-----------------|------------|-------------|------------|
| 1  | F:\wbamodule\ |    |   |      |            |            |                 |            |             |            |
| 2  | Jangkorea     | 41 | 0 | 2023 | 10.31083/j | 10.1212/W  | 10.1212/W       | 10.1007/s1 | 10.1097/OC  | 10.1016/j; |
| 3  |               | 75 | 1 | 2022 | 10.1097/M  | 10.1       |                 | 0.1016/B   | 10.3389/fn  | 10.3389/fr |
| 4  |               | 25 | 0 | 2022 | 10.1097/W  | 10.3       | Takeout DOI     | 0.1016/j.r | 10.1002/m   | 10.1196/ar |
| 5  |               | 10 | 1 | 2022 | 10.4103/l  | 10.1097/PF | 10.1186/s1      | 10.1186/s4 | 10.2165/OC  | 10.1097/M  |
| 6  |               | 69 | 0 | 2022 | 10.3390/he | 10.1007/s1 | 10.1007/s1      | 0.1016/j.t | 10.1177/l   | 10.2165/O  |
| 7  |               | 29 | 0 | 2022 | 10.1097/M  | 10.10      | Remove not Self | 0.1007/s1  | 10.1093/br  | 10.1016/j; |
| 8  |               | 34 | 0 | 2022 | 10.1097/M  | 10.12      |                 | 0.1007/s1  | 10.1016/j.r | 10.3171/J  |
| 9  |               | 80 | 0 | 2022 | 10.3389/fn | 10.11      |                 | 0.1136/br  | 10.3390/br  | 10.1109/T  |
| 10 |               | 38 | 0 | 2022 | 10.1097/M  | 10.33      | Remove space    | 0.1001/ar  | 10.1126/sc  | 10.1016/S. |
| 11 |               | 22 | 0 | 2022 | 10.1097/M  | 10.10      |                 | 0.1016/j.r | 10.1080/O   | 10.1111/c  |
| 12 |               | 33 | 0 | 2022 | 10.1097/M  | 10.1016/j  | 10.1016/j       | 10.1097/OC | 10.1159/OC  | 10.1038/m  |
| 13 |               | 31 | 4 | 2022 | 10.1097/PF | 10.33      | To links        | 0.3233/TF  | 10.4103/l   | 10.31083/  |
| 14 |               | 28 | 0 | 2022 | 10.1097/M  | 10.11      |                 | 0.1001/jai | 10.1097/OC  | 10.1159/O  |
| 15 |               | 97 | 0 | 2022 | 10.3390/di | 10.1097/OC | 10.1136/JN      | 10.1007/s1 | 10.1016/SC  | 10.1080/O  |
| 16 |               | 32 | 0 | 2022 | 10.3390/he | 10.3390/he | 10.1161/S1      | 10.1097/OC | 10.1159/OC  | 10.1038/m  |
| 17 |               | 47 | 0 | 2022 | 10.3390/di | 10.1007/s1 | 10.1016/S1      | 10.1007/s1 | 10.1097/N   | 10.1177/l  |
| 18 |               | 53 | 2 | 2022 | 10.3389/fn | 10.1161/O  | 10.1007/s1      | 10.1007/s0 | 10.1177/l   | 10.1002/jn |

Extract data from the text file in Excel

|    | A             | B  | C | D    | E          | F          | G                 | H                     | I                     | J           |
|----|---------------|----|---|------|------------|------------|-------------------|-----------------------|-----------------------|-------------|
| 1  | F:\wbamodule\ |    |   |      |            |            |                   |                       |                       |             |
| 2  | Jangkorea     | 41 | 0 | 2023 | 10.31083/j | 10.3389/fn | 10.1097/M         | 10.1080/02            | 10.1097/M             | 10.3109/08  |
| 3  |               | 75 | 1 | 2022 | 10.1097/M  | 10.3       |                   | 416                   |                       |             |
| 4  |               | 25 | 0 | 2022 | 10.1097/W  | 10.1       | Takeout DOI       | 0.4103/16             | 10.1097/M             | 10.1097/MI  |
| 5  |               | 10 | 1 | 2022 | 10.4103/16 | 10.1097/M  | 10.1161/STROKEAHA | 111.000269            |                       |             |
| 6  |               | 69 | 0 | 2022 | 10.3390/he | 10.1007/   | 10.1102/16        | 10.3389/fn            | 10.1097/M             | 10.1097/M   |
| 7  |               | 29 | 0 | 2022 | 10.1097/M  | 10.10      | Remove not Self   | 0.1016/j.j            | 10.1016/j.r           | 10.1186/14  |
| 8  |               | 34 | 0 | 2022 | 10.1097/M  | 10.10      | Remove space      | 0.1097/PH             | 10.1136/jn            | 10.1007/s10 |
| 9  |               | 80 | 0 | 2022 | 10.3389/fn | 10.33      |                   | 0194                  |                       |             |
| 10 |               | 38 | 0 | 2022 | 10.1097/M  | 10.10      | Remove space      | 0.1136/jn             | 10.1097/M             | 10.1212/W   |
| 11 |               | 22 | 0 | 2022 | 10.1097/M  | 10.10      |                   | 0.1136/jn             | 10.1007/s10286-020-00 |             |
| 12 |               | 33 | 0 | 2022 | 10.1097/M  | 10.1097/M  | 10.2340/16        | 10.1097/M             | 10.1210/jc            | 2018-02502  |
| 13 |               | 31 | 4 | 2022 | 10.1097/PH | 10.41      | To links          | 0.1177/17             | 10.1111/ajs           | 10.1016/j.r |
| 14 |               | 28 | 0 | 2022 | 10.1097/M  | 10.33      |                   | 0.1089/me             | 10.3109/02699052.201  |             |
| 15 |               | 97 | 0 | 2022 | 10.3390/di | 10.3390/he | 10.1097/M         | 10.4103/16            | 10.1093/pr            | 10.1097/M   |
| 16 |               | 32 | 0 | 2022 | 10.3390/he | 10.2340/16 | 10.1016/j.j       | 10.3233/NRE-2009-0479 |                       |             |
| 17 |               | 47 | 0 | 2022 | 10.3390/di | 10.1007/s1 | 10.3389/fn        | 10.1097/M             | 10.1097/M             | 10.1177/03  |

Only those eligible articles are involved in this study (note, articles in column E is the published articles and others are cited by the articles in column E)

The next two are counts of cited articles in each and citations and years on this article)

|    | A                           | B                             | C |
|----|-----------------------------|-------------------------------|---|
| 1  | citing                      | cited                         |   |
| 2  | 10.31083/j.jin2202046       | 10.3389/fneur.2019.01199      |   |
| 3  | 10.31083/j.jin2202046       | 10.1097/MD.0000000000014306   |   |
| 4  | 10.31083/j.jin2202046       | 10.1080/02699052.2016.1239274 |   |
| 5  | 10.31083/j.jin2202046       | 10.1097/MD.0000000000005958   |   |
| 6  | 10.31083/j.jin2202046       | 10.3109/08990220.2013.796923  |   |
| 7  | 10.31083/j.jin2202046       | 10.3109/02699052.2014.887228  |   |
| 8  | 10.31083/j.jin2202046       | 10.3390/diagnostics10010019   |   |
| 9  | 10.1097/MD.0000000000031808 | 10.3389/fnhum.2013.00416      |   |
| 10 | 10.1097/WNR.00000000000018  | 10.1097/MD.0000000000023933   |   |
| 11 | 10.1097/WNR.00000000000018  | 10.1097/MD.0000000000019937   |   |
| 12 | 10.1097/WNR.00000000000018  | 10.4103/1673-5374.276362      |   |
| 13 | 10.1097/WNR.00000000000018  | 10.1097/MD.0000000000005234   |   |
| 14 | 10.1097/WNR.00000000000018  | 10.1097/MD.0000000000004041   |   |
| 15 | 10.4103/1673-5374.339013    | 10.1097/MD.0000000000014307   |   |
| 16 | 10.4103/1673-5374.339013    | 10.1161/STROKEAHA.111.000269  |   |
| 17 | 10.3390/healthcare10101927  | 10.1097/PHM.0000000000000076  |   |
| 18 | 10.3390/healthcare10101927  | 10.4103/1673-5374.303046      |   |

To generate the couple pair-relationship

Clear

```
countryA,countryB
Taiwan,Taiwan
Canada,Canada
U.K,U.K
China,China
China,China
China,China
Singapore,Singapore
South Korea,South Korea
China,China
South Korea,South Korea
U.S,U.S
China,China
China,China
Grenada,Grenada
```

to draw plots in R

Chinese notes

Submit for MAuthorcorrence

Start[here]. 2-column(couple) data  
 Start[here]2. 2-column(couple) Excluding  
 60A7A.D1:3-column to 6-column data  
 60A7B.D1:3 to 4 for Network in SNA

Start[here]. 2-column(couple) data  
 Start[here]2. 2-column(couple) Excluding

Submit

Tips for R

Copy & Paste the Code in R to Rstudio

Select text

```
Source,Target,WCD
Taiwan,Taiwan,7
Canada,Canada,2
U.K,U.K,4
China,China,54
Singapore,Singapore,1
South_Korea,South_Korea,8
U.S,U.S,5
Grenada,Grenada,1
Ireland,Ireland,1
France,France,1
China,U.S,3
China,Hong_Kong,3
Italy,Italy,1
Spain,Spain,2
Australia.Australia.1
```

To generate the 3-column dataset from the 2-column dataset

next to AuthorCorrence/  
(Clear/Type/Submit to see data format)

Clear

```
Source,Target,WCD  
Taiwan,Taiwan,7  
Canada,Canada,2  
U.K,U.K,4  
China,China,54  
Singapore,Singapore,1  
South_Korea,South_Korea,8  
U.S,U.S,5  
Grenada,Grenada,1  
Ireland,Ireland,1  
France,France,1  
China,U.S,3  
China,Hong_Kong,3  
Italy,Italy,1  
Spain,Spain,2
```

to draw plots in R

Chinese notes

Submit for MAuthorcorrence

60A7B.D1:3 to 4 for Network in SNA

60A7C.D1:6 to 4 for Network in SNA

60A7A.D1:5-COLUMN TO 6-COLUMN data

60A7B.D1:3 to 4 for Network in SNA

Submit

Tips for R The number of Clusers is set at (2,targe, value) = 2, for example  
Copy & Paste the Code in R to Rstudio

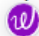

Select text

```
Leader,follower,cluster,WCD  
China,China,1,54  
South_Korea,South_Korea,2,8  
Taiwan,Taiwan,3,7  
U.S,U.S,1,5  
U.K,U.K,4,4  
China,U.S,1,3  
China,Hong_Kong,1,3  
Canada,Canada,5,2  
Spain,Spain,6,2  
France,France,7,1  
Singapore,Singapore,8,1
```

Cluster analysis is performed and shown in the third column. WCD is in the 4 column.

FG2C. Two mode data for Box Plot  
 FG2D. Details:Two mode data of year in cc  
 IBPA1. Impact bar plot by year or by them  
 IBPA2. Impact bar plot by year with links  
 KW01 Article related to keyword analysis  
 H World Maps(Choronleth maps)

To produce the IBP plot

| C    | D     | E  | F   | G     | H  |
|------|-------|----|-----|-------|----|
| 2006 | 61.00 | 1  | 61  | 13.00 | 3  |
| 2007 | 72.17 | 6  | 433 | 17.00 | 4  |
| 2008 | 49.33 | 6  | 296 | 6.00  | 2  |
| 2009 | 28.40 | 20 | 568 | 12.43 | 2  |
| 2010 | 21.89 | 37 | 810 | 13.00 | 3  |
| 2011 | 14.18 | 44 | 624 | 16.25 | 5  |
| 2012 | 15.74 | 39 | 614 | 24.00 | 9  |
| 2013 | 17.32 | 44 | 762 | 27.00 | 50 |
| 2014 | 15.33 | 42 | 644 | 16.60 | 16 |
| 2015 | 10.41 | 39 | 406 | 8.75  | 6  |
| 2016 | 6.33  | 66 | 418 | 20.00 | 6  |
| 2017 | 4.92  | 48 | 236 | 12.50 | 6  |
| 2018 | 3.73  | 33 | 123 | 11.13 | 6  |
| 2019 | 5.56  | 25 | 139 | 8.89  | 6  |
| 2020 | 3.19  | 32 | 102 | 3.67  | 6  |
| 2021 | 1.36  | 25 | 34  | 0.50  | 6  |

Prepare data in this way for the table 1

|    | J                               | K    | L        | M          | N        | O   | P       |
|----|---------------------------------|------|----------|------------|----------|-----|---------|
|    | article                         | Year | citation | percentage | citation | WCD | Cluster |
| 1  | 10.1161/STROKEAHA.111.000269    | 2013 | 114      | 99         | 114      | 62  | 1       |
| 2  | 10.3233/NRE-2009-0480           | 2009 | 93       | 99         | 93       | 56  | 2       |
| 3  | 10.3349/ymj.2011.52.4.553       | 2011 | 66       | 97         | 66       | 52  | 2       |
| 4  | 10.1016/j.neulet.2011.11.030    | 2012 | 86       | 98         | 86       | 51  | 1       |
| 5  | 10.2340/16501977-1782           | 2014 | 70       | 97         | 70       | 44  | 2       |
| 6  | 10.3389/fnhum.2013.00416        | 2013 | 98       | 99         | 98       | 42  | 3       |
| 7  | 10.1159/000281108               | 2010 | 59       | 97         | 59       | 39  | 3       |
| 8  | 10.1097/MRR.0b013e32833f0500    | 2010 | 73       | 98         | 73       | 34  | 2       |
| 9  | 10.3109/02699052.2014.887228    | 2014 | 28       | 89         | 28       | 33  | 1       |
| 10 | 10.1016/j.neulet.2014.07.024    | 2014 | 51       | 95         | 51       | 30  | 3       |
| 11 | 10.3233/NRE-2012-0790           | 2012 | 41       | 94         | 41       | 30  | 1       |
| 12 | 10.1097/01.wnr.0000220128.01597 | 2006 | 61       | 97         | 61       | 29  | 2       |
| 13 | 10.2340/16501977-1145           | 2013 | 29       | 89         | 29       | 26  | 1       |
| 14 | 10.3389/fneur.2019.01188        | 2019 | 29       | 89         | 29       | 26  | 2       |
| 15 | 10.1016/j.neulet.2009.10.075    | 2010 | 45       | 95         | 45       | 26  | 3       |
| 16 | 10.1097/01.wnr.0000220128.01597 | 2006 | 61       | 97         | 61       | 29  | 2       |
| 17 | 10.1097/01.wnr.0000220128.01597 | 2006 | 61       | 97         | 61       | 29  | 2       |
| 18 | 10.1097/01.wnr.0000220128.01597 | 2006 | 61       | 97         | 61       | 29  | 2       |

The second table is in this way for publication list

|    | A                           | B                             | C |
|----|-----------------------------|-------------------------------|---|
| 1  | citing                      | cited                         |   |
| 2  | 10.31083/j.jin2202046       | 10.3389/fneur.2019.01199      |   |
| 3  | 10.31083/j.jin2202046       | 10.1097/MD.0000000000014306   |   |
| 4  | 10.31083/j.jin2202046       | 10.1080/02699052.2016.1239274 |   |
| 5  | 10.31083/j.jin2202046       | 10.1097/MD.0000000000005958   |   |
| 6  | 10.31083/j.jin2202046       | 10.3109/08990220.2013.796923  |   |
| 7  | 10.31083/j.jin2202046       | 10.3109/02699052.2014.887228  |   |
| 8  | 10.31083/j.jin2202046       | 10.3390/diagnostics10010019   |   |
| 9  | 10.1097/MD.0000000000031808 | 10.3389/fnhum.2013.00416      |   |
| 10 | 10.1097/WNR.00000000000018  | 10.1097/MD.0000000000023933   |   |
| 11 | 10.1097/WNR.00000000000018  | 10.1097/MD.0000000000019937   |   |
| 12 | 10.1097/WNR.00000000000018  | 10.4103/1673-5374.276362      |   |
| 13 | 10.1097/WNR.00000000000018  | 10.1097/MD.0000000000005234   |   |
| 14 | 10.1097/WNR.00000000000018  | 10.1097/MD.0000000000004041   |   |
| 15 | 10.4103/1673-5374.339013    | 10.1097/MD.0000000000014307   |   |
| 16 | 10.4103/1673-5374.339013    | 10.1161/STROKEAHA.111.000269  |   |
| 17 | 10.3390/healthcare10101927  | 10.1097/PHM.0000000000000076  |   |
| 18 | 10.3390/healthcare10101927  | 10.4103/1673-5374.303046      |   |
| 19 | 10.3390/healthcare10101927  | 10.3390/healthcare10101927    |   |

The third is the one with couple pair relationship

responses (rows for person and columns for the

|      |       |    |     |       |    |
|------|-------|----|-----|-------|----|
| 2008 | 13.00 | 1  | 13  | 13.00 | 1  |
| 2009 | 17.00 | 4  | 68  | 17.00 | 2  |
| 2010 | 6.00  | 2  | 12  | 6.00  | 3  |
| 2011 | 12.43 | 7  | 87  | 12.43 | 4  |
| 2012 | 13.00 | 2  | 26  | 13.00 | 5  |
| 2013 | 16.25 | 4  | 65  | 16.25 | 6  |
| 2014 | 24.00 | 1  | 24  | 24.00 | 7  |
| 2015 | 27.00 | 1  | 27  | 27.00 | 8  |
| 2016 | 16.60 | 5  | 83  | 16.60 | 9  |
| 2017 | 8.75  | 4  | 35  | 8.75  | 10 |
| 2018 | 20.00 | 2  | 40  | 20.00 | 11 |
| 2019 | 12.50 | 6  | 75  | 12.50 | 12 |
| 2020 | 11.13 | 15 | 167 | 11.13 | 13 |
| 2021 | 8.89  | 19 | 169 | 8.89  | 14 |
| 2022 | 3.67  | 30 | 110 | 3.67  | 15 |
| 2023 | 0.50  | 10 | 5   | 0.50  | 16 |

Ranked by Pubs by year in columns: Weighted RCR by Year, Median RCR by Year, Total Citations | blanks from MS Excel

|                             |      |   |    |   |    |   |
|-----------------------------|------|---|----|---|----|---|
| 10.1097/MD.0000000000033519 | 2023 | 0 | 0  | 0 | 5  | 2 |
| 10.1097/MD.0000000000033164 | 2023 | 0 | 1  | 0 | 6  | 2 |
| 10.1097/MD.0000000000032955 | 2023 | 0 | 2  | 0 | 6  | 2 |
| 10.1097/MD.0000000000033057 | 2023 | 0 | 3  | 0 | 5  | 2 |
| 10.1097/MD.0000000000032824 | 2023 | 0 | 4  | 0 | 11 | 2 |
| 10.1097/MD.0000000000032797 | 2023 | 0 | 5  | 0 | 1  | 3 |
| 10.1097/MD.0000000000032670 | 2023 | 0 | 6  | 0 | 1  | 1 |
| 10.1097/MD.0000000000032609 | 2023 | 0 | 7  | 0 | 10 | 2 |
| 10.1097/MD.0000000000032392 | 2022 | 0 | 8  | 0 | 2  | 3 |
| 10.1097/MD.0000000000032369 | 2022 | 0 | 9  | 0 | 10 | 2 |
| 10.1007/s11192-022-04600-6  | 2023 | 1 | 20 | 1 | 1  | 2 |
| 10.1097/MD.0000000000030249 | 2022 | 0 | 0  | 0 | 6  | 3 |
| 10.1097/MD.0000000000032101 | 2022 | 3 | 30 | 3 | 14 | 2 |
| 10.1007/s11192-022-04549-6  | 2023 | 4 | 36 | 4 | 13 | 2 |
| 10.1097/MD.0000000000031335 | 2022 | 0 | 0  | 0 | 7  | 2 |
| 10.1097/MD.0000000000031144 | 2022 | 3 | 30 | 3 | 7  | 2 |

PMID, Year, RCR, NIH Percentile, Total Citations, AW

|                             |                             |
|-----------------------------|-----------------------------|
| 10.1097/MD.0000000000033519 | 10.1186/s40001-021-00494-x  |
| 10.1097/MD.0000000000033519 | 10.2196/11627               |
| 10.1097/MD.0000000000033519 | 10.2196/11567               |
| 10.1097/MD.0000000000033519 | 10.1186/s40001-021-00528-4  |
| 10.1097/MD.0000000000033519 | 10.3390/ijerph18052461      |
| 10.1097/MD.0000000000033164 | 10.2196/11567               |
| 10.1097/MD.0000000000033164 | 10.1097/MD.0000000000030217 |
| 10.1097/MD.0000000000033164 | 10.1097/MD.0000000000030682 |
| 10.1097/MD.0000000000033164 | 10.1097/MD.0000000000029213 |
| 10.1097/MD.0000000000033164 | 10.1097/MD.0000000000024610 |
| 10.1097/MD.0000000000033164 | 10.3390/ijerph18052461      |
| 10.1097/MD.0000000000032955 | 10.1007/s11192-022-04549-6  |

Copy and paste data onto the website

10.1097/MD.0000000000030217  
10.1097/MD.0000000000030682

x-index on column    Grouping in last column ▼

Submit

Read me    Forest plot

Submit to generate the IBP



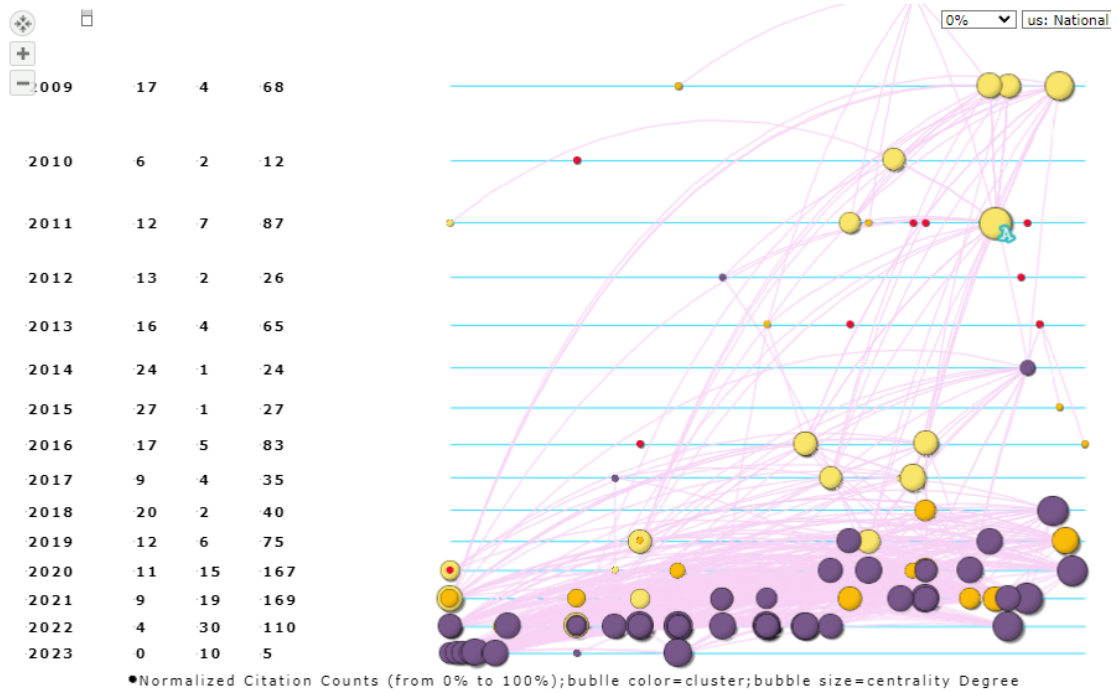

• **hindex = 18; xindex = 21.02; [Self-Cited = Density = 9.51%]**

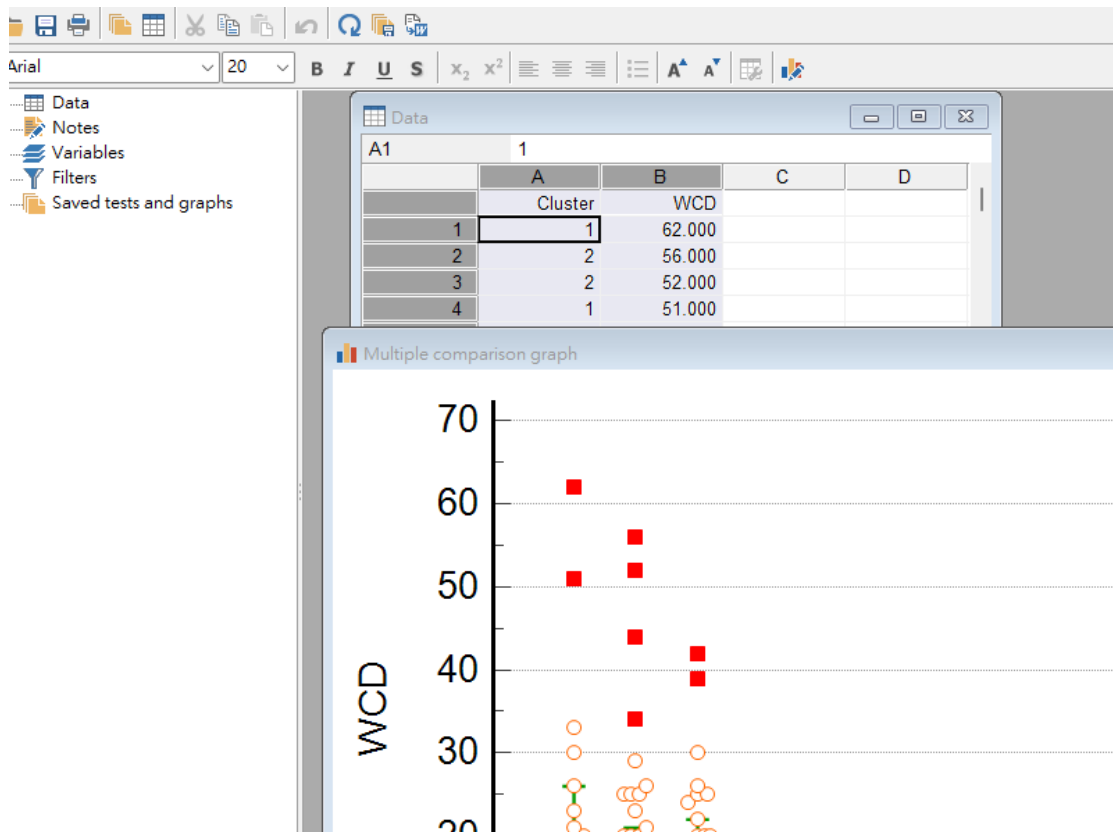

To draw the box plot in Medcal

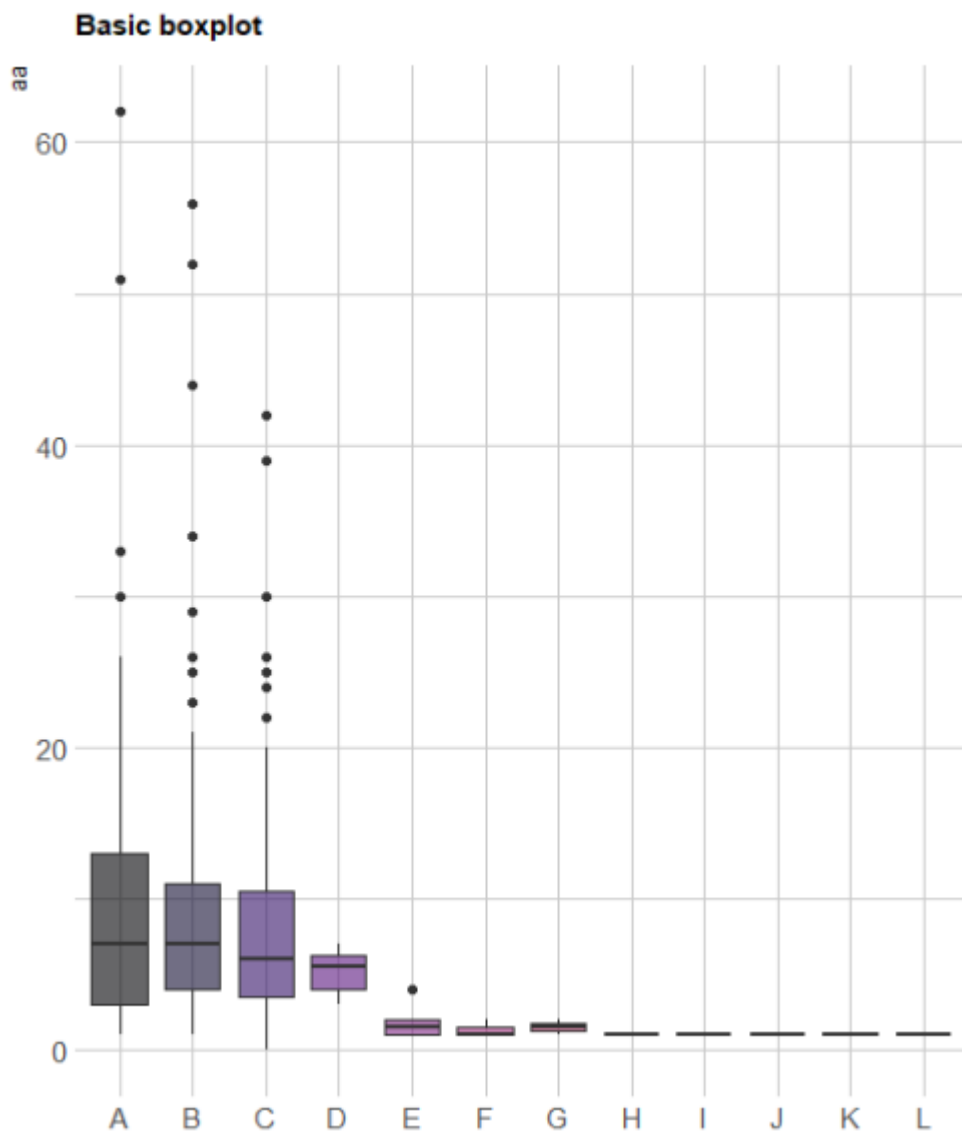

Box plot in R

# Libraries

```
library(ggplot2)
```

```
library(dplyr)
```

```
library(tidyr)
```

```
library(forcats)
```

```
library(hrbrthemes)
```

```
library(viridis)
```

```
library(tidyverse)
```

```
library(hrbrthemes)
```

```
library(viridis)
```

```
data <-
```

```
data.frame(bb=c("A","B","B","A","B","C","C","B","A","C","A","B","A","B","C","B","B",
```



```

0 ,10.00 ,10.00 ,10.00 ,10.00 ,10.00 ,10.00 ,10.00 ,10.00 ,10.00 ,10.00 ,9.00 ,9.00 ,9.0
0 ,9.00 ,9.00 ,9.00 ,9.00 ,9.00 ,9.00 ,9.00 ,9.00 ,9.00 ,9.00 ,9.00 ,9.00 ,9.00 ,9.00 ,9.00
,9.00 ,9.00 ,9.00 ,9.00 ,9.00 ,9.00 ,9.00 ,9.00 ,9.00 ,9.00 ,8.00 ,8.00 ,8.00 ,8.00 ,8.00 ,8.00 ,8
.00 ,8.00 ,8.00 ,8.00 ,8.00 ,8.00 ,8.00 ,8.00 ,8.00 ,8.00 ,8.00 ,8.00 ,8.00 ,8.00 ,8.00 ,8.00 ,8.00
0 ,8.00 ,8.00 ,8.00 ,8.00 ,8.00 ,8.00 ,8.00 ,8.00 ,8.00 ,8.00 ,8.00 ,8.00 ,8.00 ,8.00 ,8.00 ,8.00
,8.00 ,8.00 ,7.00 ,7.00 ,7.00 ,7.00 ,7.00 ,7.00 ,7.00 ,7.00 ,7.00 ,7.00 ,7.00 ,7.00 ,7.00 ,7.00 ,7
.00 ,7.00 ,7.00 ,7.00 ,7.00 ,7.00 ,7.00 ,7.00 ,7.00 ,7.00 ,7.00 ,7.00 ,7.00 ,7.00 ,7.00 ,7.00 ,7.0
0 ,7.00 ,7.00 ,7.00 ,7.00 ,7.00 ,7.00 ,7.00 ,7.00 ,7.00 ,6.00 ,6.00 ,6.00 ,6.00 ,6.00 ,6.00 ,6.00
,6.00 ,6.00 ,6.00 ,6.00 ,6.00 ,6.00 ,6.00 ,6.00 ,6.00 ,6.00 ,6.00 ,6.00 ,6.00 ,6.00 ,6.00 ,6.00 ,6
.00 ,6.00 ,6.00 ,6.00 ,6.00 ,6.00 ,6.00 ,6.00 ,6.00 ,6.00 ,6.00 ,6.00 ,6.00 ,6.00 ,6.00 ,6.00 ,6.0
0 ,6.00 ,6.00 ,6.00 ,6.00 ,6.00 ,6.00 ,5.00 ,5.00 ,5.00 ,5.00 ,5.00 ,5.00 ,5.00 ,5.00 ,5.00 ,5.00
,5.00 ,5.00 ,5.00 ,5.00 ,5.00 ,5.00 ,5.00 ,5.00 ,5.00 ,5.00 ,5.00 ,5.00 ,5.00 ,5.00 ,5.00 ,5.00 ,5
.00 ,5.00 ,5.00 ,5.00 ,5.00 ,5.00 ,5.00 ,5.00 ,5.00 ,5.00 ,5.00 ,5.00 ,5.00 ,5.00 ,5.00 ,5.00 ,5.0
0 ,5.00 ,5.00 ,5.00 ,4.00 ,4.00 ,4.00 ,4.00 ,4.00 ,4.00 ,4.00 ,4.00 ,4.00 ,4.00 ,4.00 ,4.00 ,4.00
,4.00 ,4.00 ,4.00 ,4.00 ,4.00 ,4.00 ,4.00 ,4.00 ,4.00 ,4.00 ,4.00 ,4.00 ,4.00 ,4.00 ,4.00 ,4.00 ,4
.00 ,4.00 ,4.00 ,4.00 ,4.00 ,4.00 ,4.00 ,4.00 ,4.00 ,4.00 ,4.00 ,4.00 ,4.00 ,4.00 ,4.00 ,4.00 ,4.0
0 ,4.00 ,4.00 ,4.00 ,4.00 ,4.00 ,4.00 ,4.00 ,4.00 ,3.00 ,3.00 ,3.00 ,3.00 ,3.00 ,3.00 ,3.00 ,3.00
,3.00 ,3.00 ,3.00 ,3.00 ,3.00 ,3.00 ,3.00 ,3.00 ,3.00 ,3.00 ,3.00 ,3.00 ,3.00 ,3.00 ,3.00 ,3.00 ,3
.00 ,3.00 ,3.00 ,3.00 ,3.00 ,3.00 ,3.00 ,3.00 ,3.00 ,3.00 ,3.00 ,3.00 ,3.00 ,3.00 ,3.00 ,3.00 ,3.0
0 ,2.00 ,2.00 ,2.00 ,2.00 ,2.00 ,2.00 ,2.00 ,2.00 ,2.00 ,2.00 ,2.00 ,2.00 ,2.00 ,2.00 ,2.00 ,2.00
,2.00 ,2.00 ,2.00 ,2.00 ,2.00 ,2.00 ,2.00 ,2.00 ,2.00 ,2.00 ,2.00 ,2.00 ,2.00 ,2.00 ,2.00 ,2.00 ,2
.00 ,2.00 ,2.00 ,2.00 ,2.00 ,2.00 ,2.00 ,2.00 ,2.00 ,1.00 ,1.00 ,1.00 ,1.00 ,1.00 ,1.00 ,1.00 ,1.0
0 ,1.00 ,1.00 ,1.00 ,1.00 ,1.00 ,1.00 ,1.00 ,1.00 ,1.00 ,1.00 ,1.00 ,1.00 ,1.00 ,1.00 ,1.00 ,1.00
,1.00 ,1.00 ,1.00 ,1.00 ,1.00 ,1.00 ,1.00 ,1.00 ,1.00 ,1.00 ,1.00 ,1.00 ,1.00 ,1.00 ,1.00 ,1.00 ,1
.00 ,1.00 ,1.00 ,1.00 ,1.00 ,1.00 ,1.00 ,1.00 ,1.00 ,1.00 ,1.00 ,1.00 ,1.00 ,1.00 ,1.00 ,1.00 ,1
.00 ,1.00 ,1.00 ,1.00 ,1.00 ,1.00 ,1.00 ,1.00 ,1.00 ,1.00 ,0.00 )
)

```

```

data %>%
  ggplot( aes(x=bb, y=aa, fill=bb)) +
    geom_boxplot() +
    scale_fill_viridis(discrete = TRUE, alpha=0.6, option="A") +
    theme_ipsum() +
    theme(
      legend.position="none",
      plot.title = element_text(size=11)
    ) +
    ggtitle("Basic boxplot") +

```

xlab("")

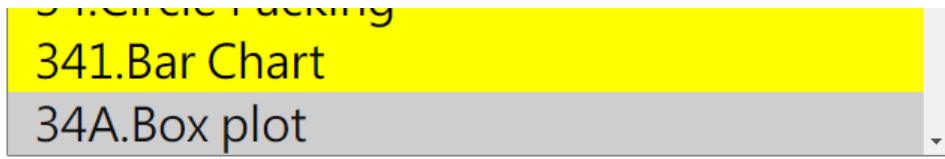

Submit

Tips for R

Copy & Paste the Code in R to Rstudio

Select text

```
# Libraries
library(ggplot2)
library(dplyr)
library(tidyr)
library(forcats)
library(hrbrthemes)
library(viridis)
library(tidyverse)
library(hrbrthemes)
library(viridis)
data <- data.frame(bb=c
("A", "B", "B", "A", "B", "C", "C", "B", "A", "C", "A", "B", "A", "B", "C", "B", "B", "C", "C", "B", "C", "B", "A", "C",

```

A screenshot of the RStudio interface. The left pane shows R code for creating a boxplot. The right pane shows the environment with variables 'graph', 'm', 'Mygraph', and 'network'. The bottom pane shows a boxplot titled 'Basic boxplot' with the y-axis labeled 'aa'.

```
library(hrbrthemes)
library(viridis)
data <- data.frame(bb=c
"A", "B", "B", "A", "B", "C", "C", "B", "A", "C", "A", "B", "A", "B", "C", "B", "B",
, aa=c(62.00, 56.00, 52.00, 51.00, 44.00, 42.00,
), 5.00, 5.00, 5.00, 5.00, 5.00, 5.00, 5.00, 5.00, 5.00, 5.00, 5.00, 5.00, 5.00,
)

data %>%
  ggplot(aes(x=bb, y=aa, fill=bb)) +
  geom_boxplot() +
  scale_fill_viridis(discrete = TRUE, alpha=0.6, option="A") +
  theme_ipsum() +
  theme(
    legend.position="none",
    plot.title = element_text(size=11)
  ) +
  ggtitle("Basic boxplot") +
  xlab("")
# Warning: there were 12 warnings (use warnings() to see them)
```

<https://youtu.be/Hp3yUUGny2M>

[https://youtu.be/MjLR\\_jZ3Rek](https://youtu.be/MjLR_jZ3Rek)
